# Supplementary material for: Chlamydia trachomatis Infection Impairs MHC-I Intracellular Trafficking and Antigen Cross-Presentation by Dendritic Cells
Source: Front Immunol. 2021 Apr 15;12:662096. doi: 10.3389/fimmu.2021.662096 (PMC8082151; doi:10.3389/fimmu.2021.662096)
Supplement: Supplementary Table 1 — List of antibodies and reagents [file Table_1.xlsx]

## Sheet: Sheet1
	Antibody	Provider	Catalogue	Reference
	rabbit anti-CT529	provided by Agathe Subtil	Unité de Biologie cellulaire de l'infection microbienne, Institut Pasteur, Paris, France	Vromman F, Stéphanie P, Lena Gehre L, and Subtil A. The DUF582 Proteins of Chlamydia trachomatis Bind to Components of the ESCRT Machinery, Which Is Dispensable for Bacterial Growth In vitro. Front Cell Infect Microbiol. 2016 Oct 7;6:123. doi: 10.3389/fcimb.2016.00123.
	goat polyclonal anti-EEA1	Santa Cruz	sc-6415	Hernández-Pérez S, Vainio M, Kuokkanen E, Šuštar V, Petrov P, Forstén S, Paavola V, Rajala J, Awoniyi LO, Sarapulov AV, Vihinen H, Jokitalo E, Bruckbauer A, Mattila PK. B cells rapidly target antigen and surface-derived MHCII into peripheral degradative compartments. J Cell Sci. 2019 Dec 20;133(5):jcs235192. doi: 10.1242/jcs.235192.
	rabbit polyclonal anti-Rab14	Aviva	AVARP13107_P050	Qi M , Williams JA, Chu H, Chen X, Wang J-J, Ding L, Akhirome E, Wen X, Lapierre LA, Goldenring JR, Spearman P. Rab11-FIP1C and Rab14 Direct Plasma Membrane Sorting and Particle Incorporation of the HIV-1 Envelope Glycoprotein Complex. PLoS Pathog. 2013;9(4):e1003278. doi: 10.1371/journal.ppat.1003278. Capmany A and Damiani MT. Chlamydia trachomatis Intercepts Golgi-derived Sphingolipids through …
	rabbit polyclonal anti-Rab4	Aviva	OALA06924	Bassam R. Ali, Christina Wasmeier, Lynn Lamoreux, Molly Strom, Miguel C. Seabra. Multiple regions contribute to membrane targeting of Rab GTPases. Journal of Cell Science 2004 117: 6401-6412; doi: 10.1242/jcs.01542
	rabbit polyclonal anti-Rab11a	Aviva	ARP63742_P050	Croce C, Mayorga LS, Cebrian I. Differential requirement of Rab22a for the recruitment of ER-derived proteins to phagosomes and endosomes in dendritic cells. Small GTPases. 2020 May;11(3):211-219. DOI: 10.1080/21541248.2017.1384088. Leiva N, Capmany A and Damiani MT. Rab11-Family of Interacting Protein 2 associates with Chlamydial inclusions through its Rab Binding Domain and promotes bacterial m…
	mouse polyclonal anti-CD63	Invitrogen	PA5-100713	Gambarte Tudela J, Capmany A, Romao M, Quintero C, Miserey-Lenkei S, Raposo G, Goud B, Damiani MT. The late endocytic Rab39a GTPase regulates the interaction between multivesicular bodies and chlamydial inclusions J Cell Sci. 2015 Aug 15;128(16):3068-81. doi: 10.1242/jcs.170092.
	mouse anti-Lamp1	BD Biosciences	611042	Alto NM, Soderling J, Scott JD. Rab32 is an A-kinase anchoring protein and participates in mitochondrial dynamics. J Biol Chem. 2002; 158(4):659-668
	mouse anti-H-2Kb (It recognizes a conformational epitope on peptide-loaded β2m-Kb HC complexes)	BD Biosciences	553570	Kuhns ST, Pease LR J A. region of conformational variability outside the peptide-binding site of a class I MHC molecule. Immunol. 1998 Dec 15;161(12):6745-50.
	FITC-coupled mouse anti-H-2Kb	BD Biosciences	562002 (AF6-88.5 clone)	Croce C, Mayorga LS, Cebrian I. Differential requirement of Rab22a for the recruitment of ER-derived proteins to phagosomes and endosomes in dendritic cells. Small GTPases. 2020 May;11(3):211-219. DOI: 10.1080/21541248.2017.1384088
	mouse monoclonal anti-TfR H68.4	Invitrogen	13-6800	Dauner K,Eid W,Raghupathy R,Presley JF,Zha X. mTOR complex 1 activity is required to maintain the canonical endocytic recycling pathway against lysosomal delivery. J Biol Chem. 2017 Apr 7; 292(14): 5737–5747. doi: 10.1074/jbc.M116.771451
	mouse monoclonal anti-Rab22a	Santa Cruz	sc-390726	Cebrian, I; Croce, C; Guerrero, NA; Blanchard, N; Mayorga, LS; Rab22a controls MHC-I intracellular trafficking and antigen cross-presentation by dendritic cells. 17, 1753-1765 (2016).
	rabbit anti-clathrin heavy chain	Abcam	ab21679	Liu Y, Claire Calmel C, Desbois-Mouthon C, Sobczak-Thépot J, Karaiskou A, Praz F. Regulation of the EGFR/ErbB signalling by clathrin in response to various ligands in hepatocellular carcinoma cell lines. J Cell Mol Med. 2020 Jul;24(14):8091-8102. doi: 10.1111/jcmm.15440.
	rabbit anti-MOMP	Provided by Ted Hackstadt	National Institute of Allergy and Infectious Diseases, National Institutes of Health, Hamilton, Montana, USA	Lujan AL, Croci DO, Gambarte Tudela JA, Losinno AD, Cagnoni AJ, Mariño KV, Damiani MT, Rabinovich GA. Glycosylation-dependent galectin-receptor interactions promote Chlamydia trachomatis infection. Proc Natl Acad Sci U S A. 2018 Jun 26;115(26):E6000-E6009. doi: 10.1073/pnas.1802188115.
	rabbit anti-OVA	Sigma	C6534	Croce C, Mayorga LS, Cebrian I. Differential requirement of Rab22a for the recruitment of ER-derived proteins to phagosomes and endosomes in dendritic cells. Small GTPases. 2020 May;11(3):211-219. DOI: 10.1080/21541248.2017.1384088
	goat Cy3-labeled anti-rabbit-IgG	Molecular Probes	A10520	Capmany A and Damiani MT. Chlamydia trachomatis Intercepts Golgi-derived Sphingolipids through a Rab14-mediated Transport Required for Bacterial Development and Replication.2010. PLoS ONE. Nov 5;22:(11). e84014.
	goat Cy3-labeled anti-mouse-IgG	Molecular Probes	M30010	Capmany A, Gambarte Tudela J, Alonso Bivou M, Damiani MT. Akt/AS160 Signaling Pathway Inhibition Impairs Infection by Decreasing Rab14-Controlled Sphingolipids Delivery to Chlamydial Inclusions. Front Microbiol. 2019 Apr 3;10:666.
	goat Cy3-labeled anti-rabbit-IgG	Molecular Probes	A10520	Capmany A, Gambarte Tudela J, Alonso Bivou M, Damiani MT. Akt/AS160 Signaling Pathway Inhibition Impairs Infection by Decreasing Rab14-Controlled Sphingolipids Delivery to Chlamydial Inclusions. Front Microbiol. 2019 Apr 3;10:666.
	goat anti-mouse-Alexa 647	Molecular Probes	A21235	Capmany A, Gambarte Tudela J, Alonso Bivou M, Damiani MT. Akt/AS160 Signaling Pathway Inhibition Impairs Infection by Decreasing Rab14-Controlled Sphingolipids Delivery to Chlamydial Inclusions. Front Microbiol. 2019 Apr 3;10:666.
	goat anti-rabbit-Alexa 647	Molecular Probes	A27040	Lujan AL, Croci DO, Gambarte Tudela JA, Losinno AD, Cagnoni AJ, Mariño KV, Damiani MT, Rabinovich GA. Glycosylation-dependent galectin-receptor interactions promote Chlamydia trachomatis infection. Proc Natl Acad Sci U S A. 2018 Jun 26;115(26):E6000-E6009. doi: 10.1073/pnas.1802188115.
	goat HRP-conjugated anti-rabbit-IgG	Jackson Immuno Research Laboratories	111-035-144	Leiva N, Capmany A and Damiani MT. Rab11-Family of Interacting Protein 2 associates with Chlamydial inclusions through its Rab Binding Domain and promotes bacterial multiplication. Cellular Microbiology 2013. 15(1):114-29. doi: 10.1111/cmi.12035.
	goat HRP-conjugated anti-mouse-IgG	Jackson ImmunoResearch Laboratories	115-035-003	Leiva N, Capmany A and Damiani MT. Rab11-Family of Interacting Protein 2 associates with Chlamydial inclusions through its Rab Binding Domain and promotes bacterial multiplication. Cellular Microbiology 2013. 15(1):114-29. doi: 10.1111/cmi.12035.
	Reagents	Provider	Catalogue
	DAPI	Life Technologies	D1306
	Lysotracker Red DND-99	Life Technologies	L7528
	OVA conjugated to Alexa 488	Molecular Probes	O-34781
	DQ Ovalbumin	Molecular Probes	D-12053
	7-AAD	Invitrogen	6993
